# Supplementary material
Source: Research Square preprint supplement (doi:10.21203/rs.3.rs-9071948/v1)
Supplement: Supplementary file 1 [file 25ac69760b0b1ddc0099deea.docx]

**Supplementary Information**

# **Supplementary Table 1** **Summary statistics for paired two-sided t test on viable cell concentration (VCC), cell specific growth rate (growth) and cell size.**

|  | VCC | Growth | Cell size |
| --- | --- | --- | --- |
| Sample size (n pairs) | 5 | 5 | 5 |
| Test statistic (t) and degrees of freedom (df) | t=1.805, df=4 | t=1.315, df=4 | t=0.9195, df=4 |
| Exact P value | 0.1453 | 0.2588 | 0.4099 |
| Mean of differences (Prodigy 2A - Prodigy 1) | -1.68 | -0.05262 | -9152 |
| 95% CI of mean difference | -4.264 to 0.9036 | -0.1637 to 0.05846 | -36787 to 18483 |
| Shapiro–Wilk normality test. p value | 0.127 | 0.3788 | 0.1572 |

# **Supplementary Table 2 Simple linear regression summary statistics for data on cytotoxic assays between tumor contacts (TC).**

|  | TC 0 CD19-/- | TC 0 | TC 1 | TC 2* | TC 3 |
| --- | --- | --- | --- | --- | --- |
| Slope | -2.525 | -4.281 | 0.995 | 1.255 | 3.096 |
| Slope Std. Error | 0.4019 | 0.9029 | 0.6519 | 0.5507 | 1.076 |
| Slope 95% CI | -3.401 to ‑1.650 | -6.248 to ‑2.314 | -0.4253 to 2.415 | 0.05471 to 2.455 | 0.7510 to 5.442 |
| Y-intercept | 59.66 | 101.9 | 78.59 | 76.61 | 63.09 |
| Y-intercept Std. Error | 2.732 | 6.138 | 4.431 | 3.744 | 7.318 |
| Y-intercept 95% CI | 53.71 to 65.61 | 88.54 to 115.3 | 68.93 to 88.24 | 68.45 to 84.77 | 47.15 to 79.04 |
| R² | 0.7669 | 0.652 | 0.1626 | 0.3019 | 0.4081 |
| F | 39.47 | 22.48 | 2.33 | 5.19 | 8.274 |
| DFn. DFd | 1. 12 | 1. 12 | 1. 12 | 1. 12 | 1. 12 |
| P value | <0.0001 | 0.0005 | 0.1528 | 0.0418 | 0.0139 |
| Number of X values | 24 | 24 | 24 | 24 | 24 |
| Maximum number of Y replicates | 3 | 3 | 3 | 3 | 3 |
| Total number of values | 14 | 14 | 14 | 14 | 14 |

The table reports slope (± Std. Error), 95% confidence intervals, Y-intercept (± Std. Error), R², F statistics with corresponding degrees of freedom, P values for the null hypothesis that the slope equals zero, and sample size information (number of X values, maximum number of replicates per X, total values, missing values). Missing values due to time shifted technical replicate for uneven process days. *TC2 did not meet normality according to Shapiro-Wilk test (p = 0.04).

# **Supplementary Table 3 Paired t-test statistics for unspecific lysis**

| Sample size (pairs) | 14 |
| --- | --- |
| Mean of differences (TC 0 – TC 0 CD19-/-) | 31,59 |
| 95% CI of difference | 25,58 to 37,61 |
| SD of differences | 10,42 |
| t, df | t=11,35, df=13 |
| P value (two-tailed) | <0,0001 |
| Effect size (partial η²) | 0,9083 |
| Correlation between paired values (r) | 0,839 |
| Correlation P value | <0,0001 |

Biological and technical replicates represented individually for tumor contact 0 (TC 0) and knock-out cell line (TC 0 CD19-/-), n = 14. Mean values of analytical triplicates were used for calculation, n = 42.

# **Supplementary Table 4 Simple linear regression** **summary statistics cell specific growth rate between tumor contacts (TC).**

|  | RPMI | TC 1 | TC 2 | TC 3 |
| --- | --- | --- | --- | --- |
| Slope | -0.1323 | -0.08202 | -0.02516 | -0.03281 |
| Slope Std. Error | 0.04324 | 0.01288 | 0.01323 | 0.01111 |
| Slope 95% CI | -0.2346 to ‑0.03010 | -0.1098 to ‑0.05420 | -0.05374 to 0.003422 | -0.05702 to ‑0.008598 |
| Y-intercept | 1.362 | 0.8904 | 0.694 | 0.6049 |
| Y-intercept Std. Error | 0.3194 | 0.09352 | 0.09607 | 0.07554 |
| Y-intercept 95% CI | 0.6068 to 2.117 | 0.6884 to 1.092 | 0.4865 to 0.9016 | 0.4403 to 0.7695 |
| R² | 0.5723 | 0.7573 | 0.2176 | 0.4208 |
| F | 9.368 | 40.57 | 3.617 | 8.718 |
| DFn, DFd | 1, 7 | 1, 13 | 1, 13 | 1, 12 |
| P value | 0.0183 | <0.0001 | 0.0796 | 0.0121 |
| Number of X values | 24 | 24 | 24 | 24 |
| Maximum number of Y replicates | 2 | 3 | 3 | 3 |
| Total number of values | 9 | 15 | 15 | 14 |

The table reports slope (± Std. Error), 95% confidence intervals, Y-intercept (± Std. Error), R², F statistics with corresponding degrees of freedom, P values for the null hypothesis that the slope equals zero, and sample size information (number of X values, maximum number of replicates per X, total values, missing values). Missing values due to time shifted technical replicate for uneven process days, data of Prodigy 1 day 12 had to be omitted.

# **Supplementary Figure 1 Remaining Raji cells of Prodigy 2A and Prodigy 2B taken after three tumor contacts (TC 3).**


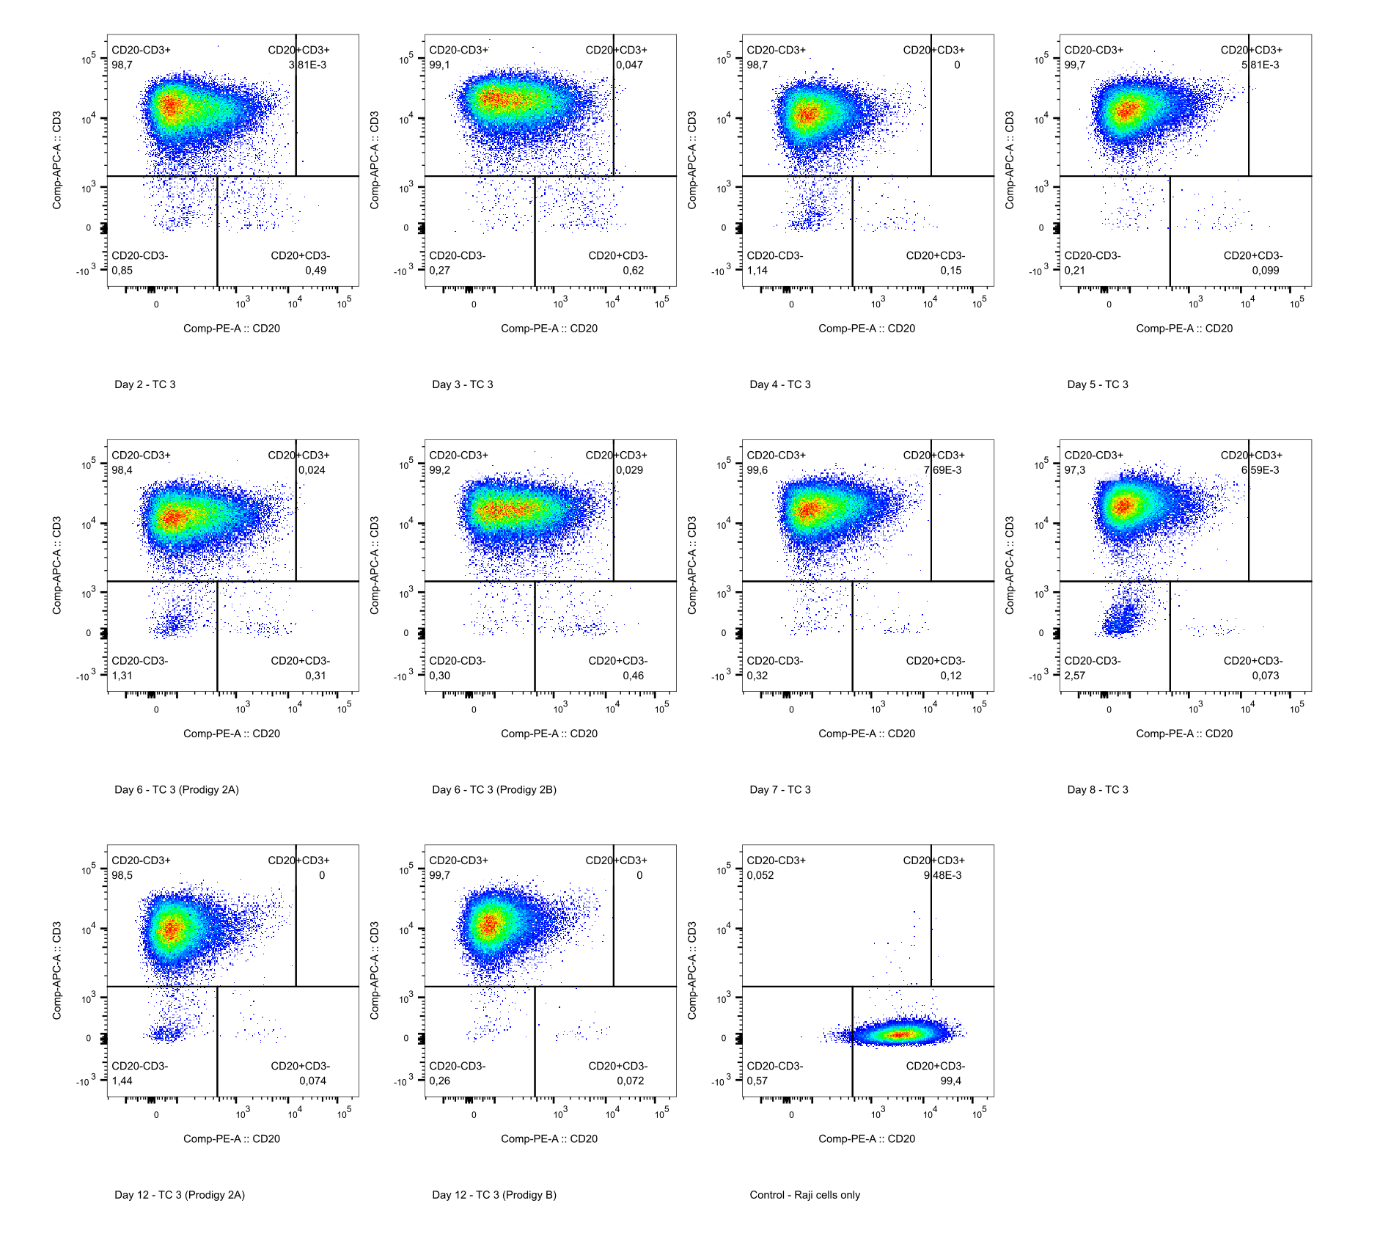


Flow cytometry analysis with gating of remaining Raji population based on CD20+ expression (Raji cells) or CD3+ (T cells).

# **Supplementary Figure 2 Cytotoxic assay at varying effector to target ratios of either 1:4 or 4:1.**


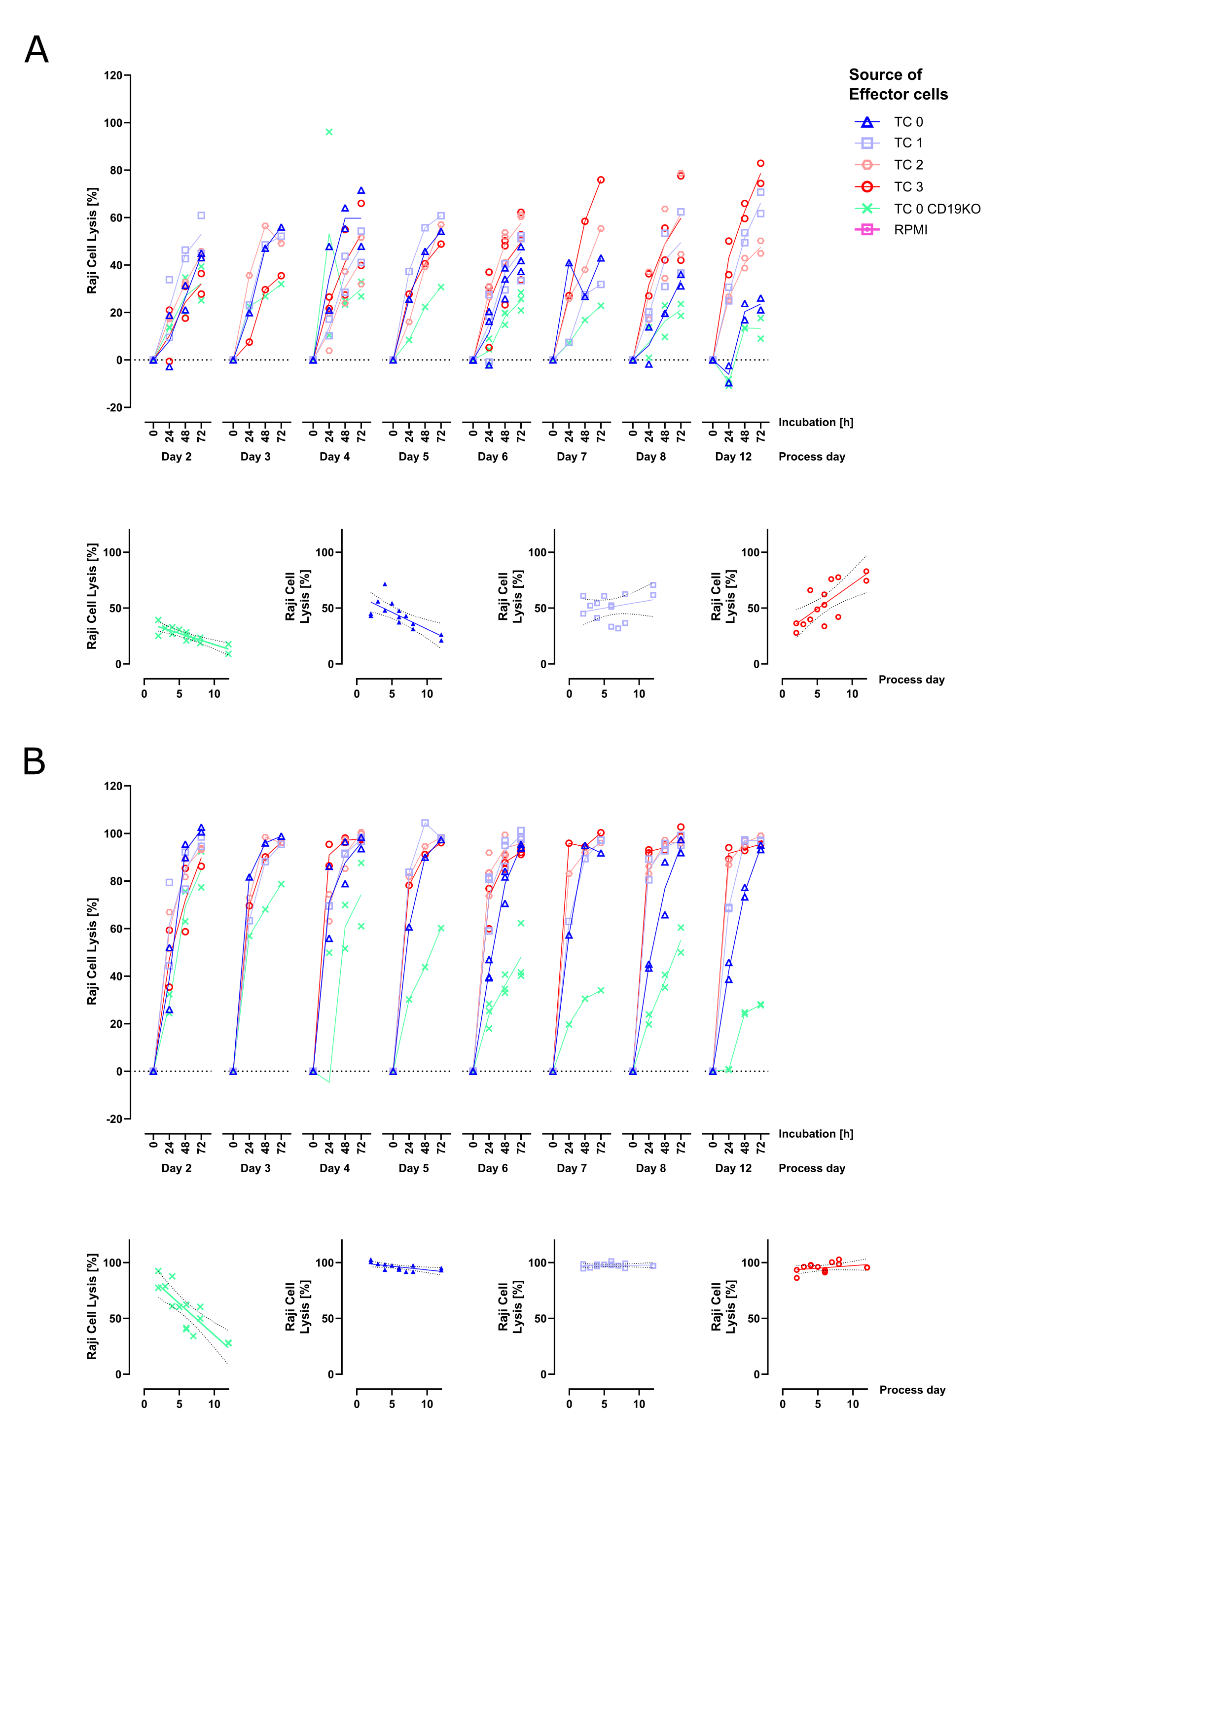


Cytotoxic assay plot on Raji cell lysis measured every 24 hours for each process day (lower x-axis) at an effector to target ratio of 1:4 (**A**) and 4:1 (**B**). For each sampling day, repeated tumor contacts (TC) every 48 hour were performed. TCs are shown between TC 0 (no tumor contact, sampled taken directly from CliniMACS Prodigy®) and TC 3. Unspecific lysis measured on a CD19 knock-out cell line of Raji (TC 0 CD19KO). Each point represents the mean of an analytical triplicate (n = 3).

# **Supplementary Figure 3 Matrix plot of expression signals for each analyte detected via DigiWest™ technology for Prodigy 1.**

Data was log-2 normalized to the respective day 0 signal of each analyte. Samples are shown for Prodigy 1 (n = 1).

# **Supplementary Figure 4 Central markers for CAR-signaling.**


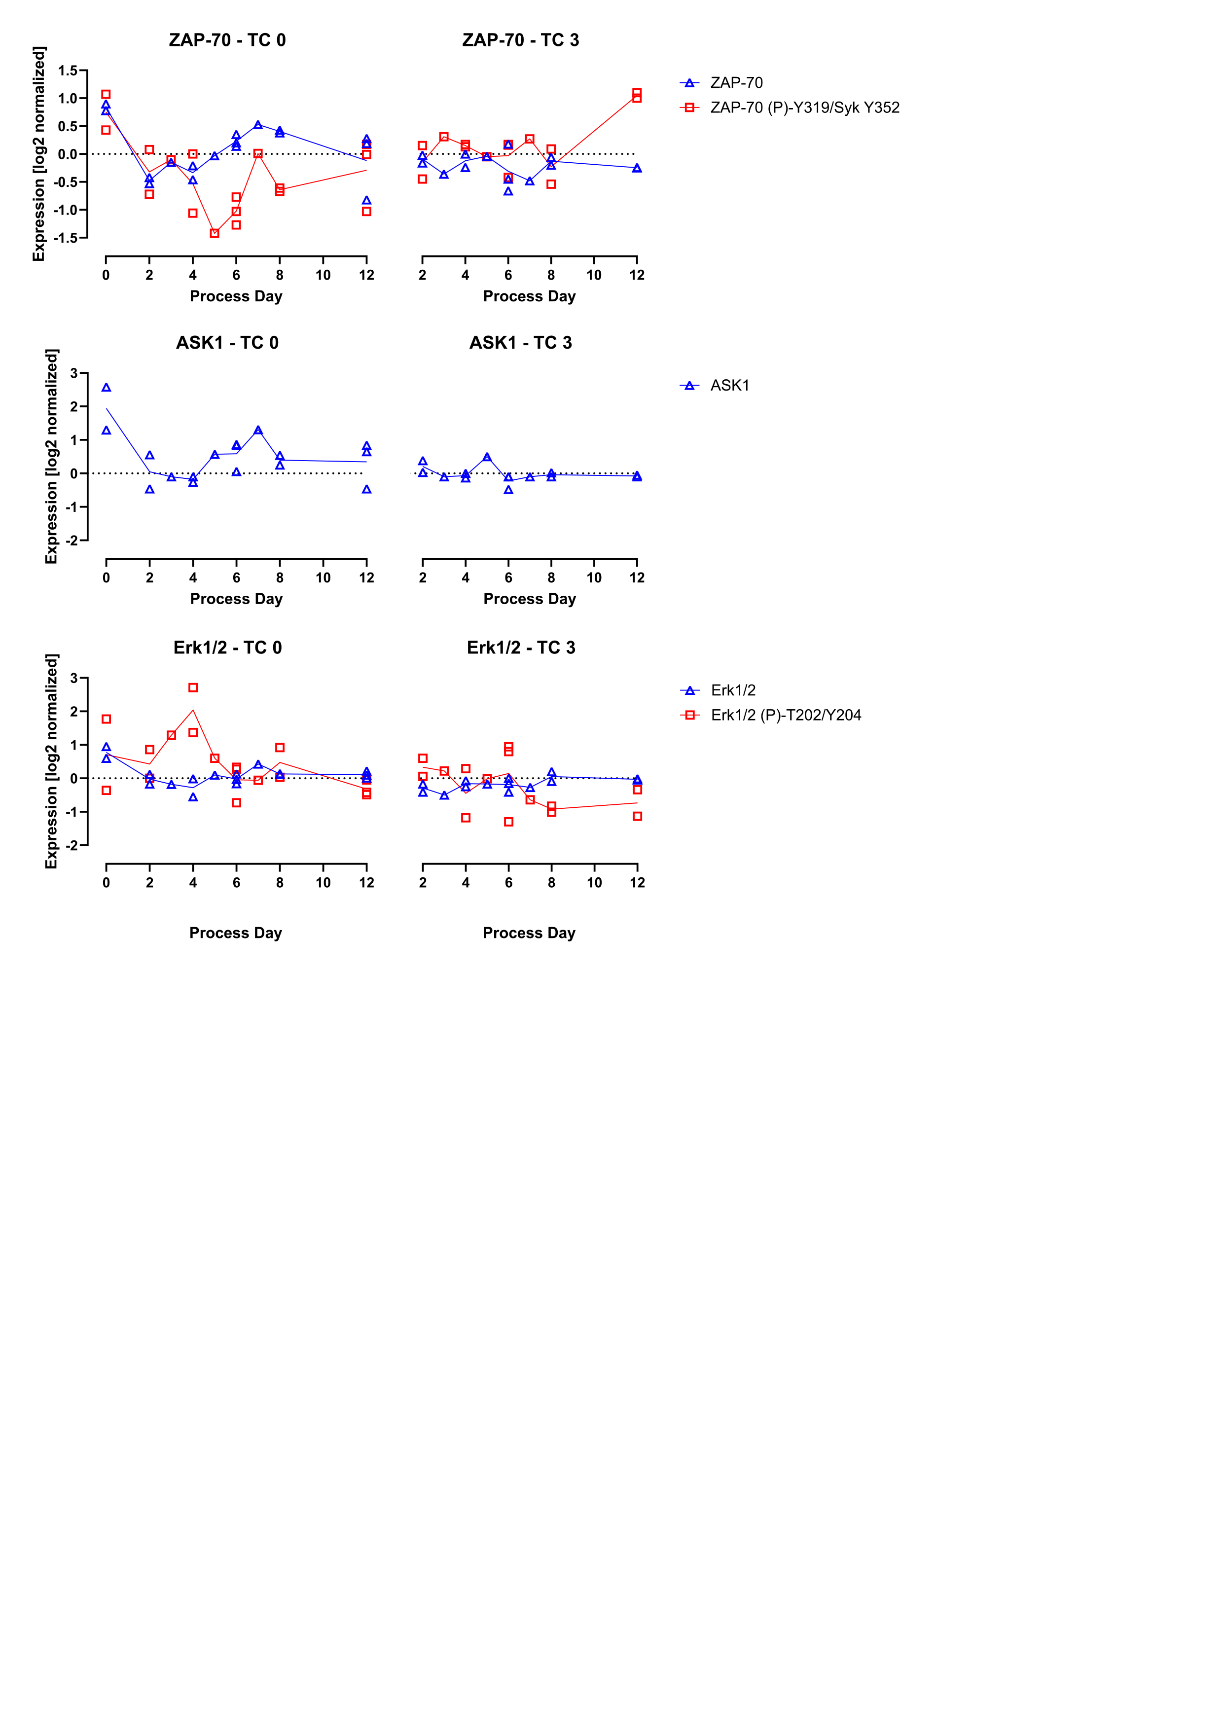


Scatter plot of DigiWest™ data for ZAP-70 ASK1 and Erk1/2 (TC 0) and after tumor contact (TC 3). Each point represents the biological replicates for even sample days n = 2 and one technical replicate of uneven sample days n = 1. Day 6 was sampled for all process runs.

# **Supplementary Figure 5 Matrix plot of CAR-signaling markers for each analyte detected via DigiWest™ technology for Prodigy 1.**

**
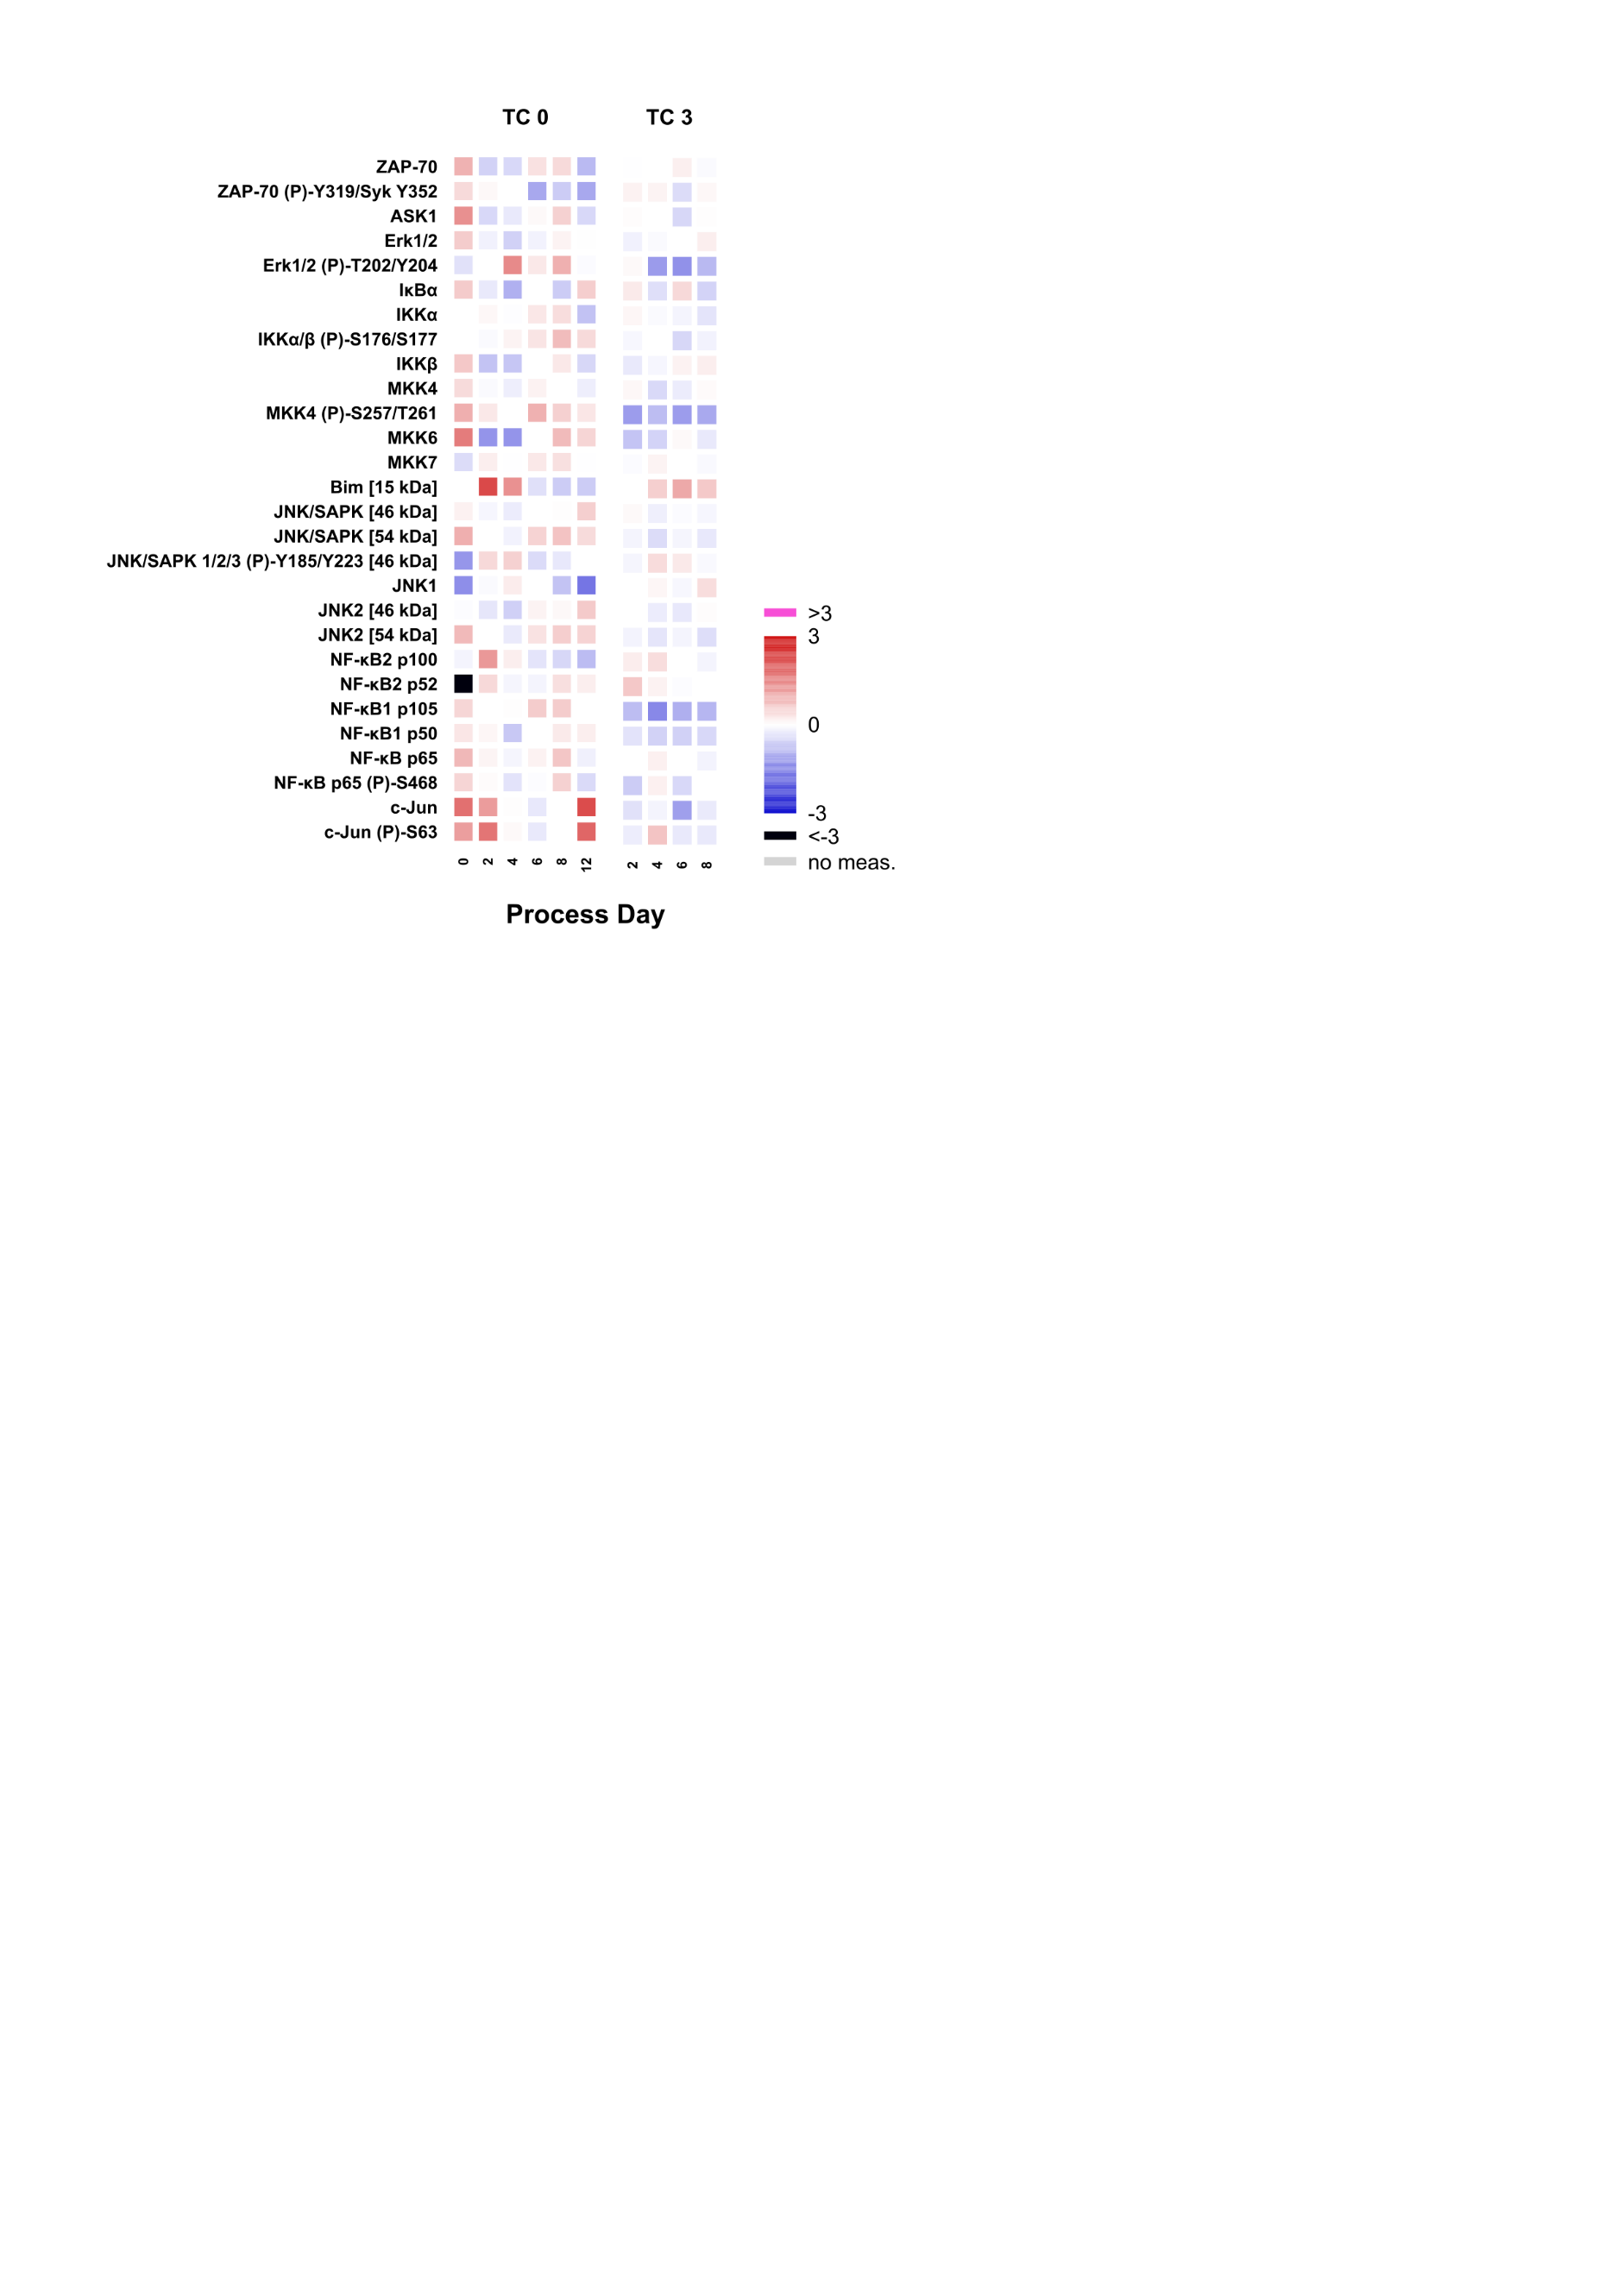
**

Data was log-2 normalized to the total mean of all signals. Samples are shown for Prodigy 1 (n = 1).

# **Supplementary Figure 6 Matrix plot of apoptosis, hypoxia and metabolism markers detected via DigiWest™ technology for Prodigy 1.**


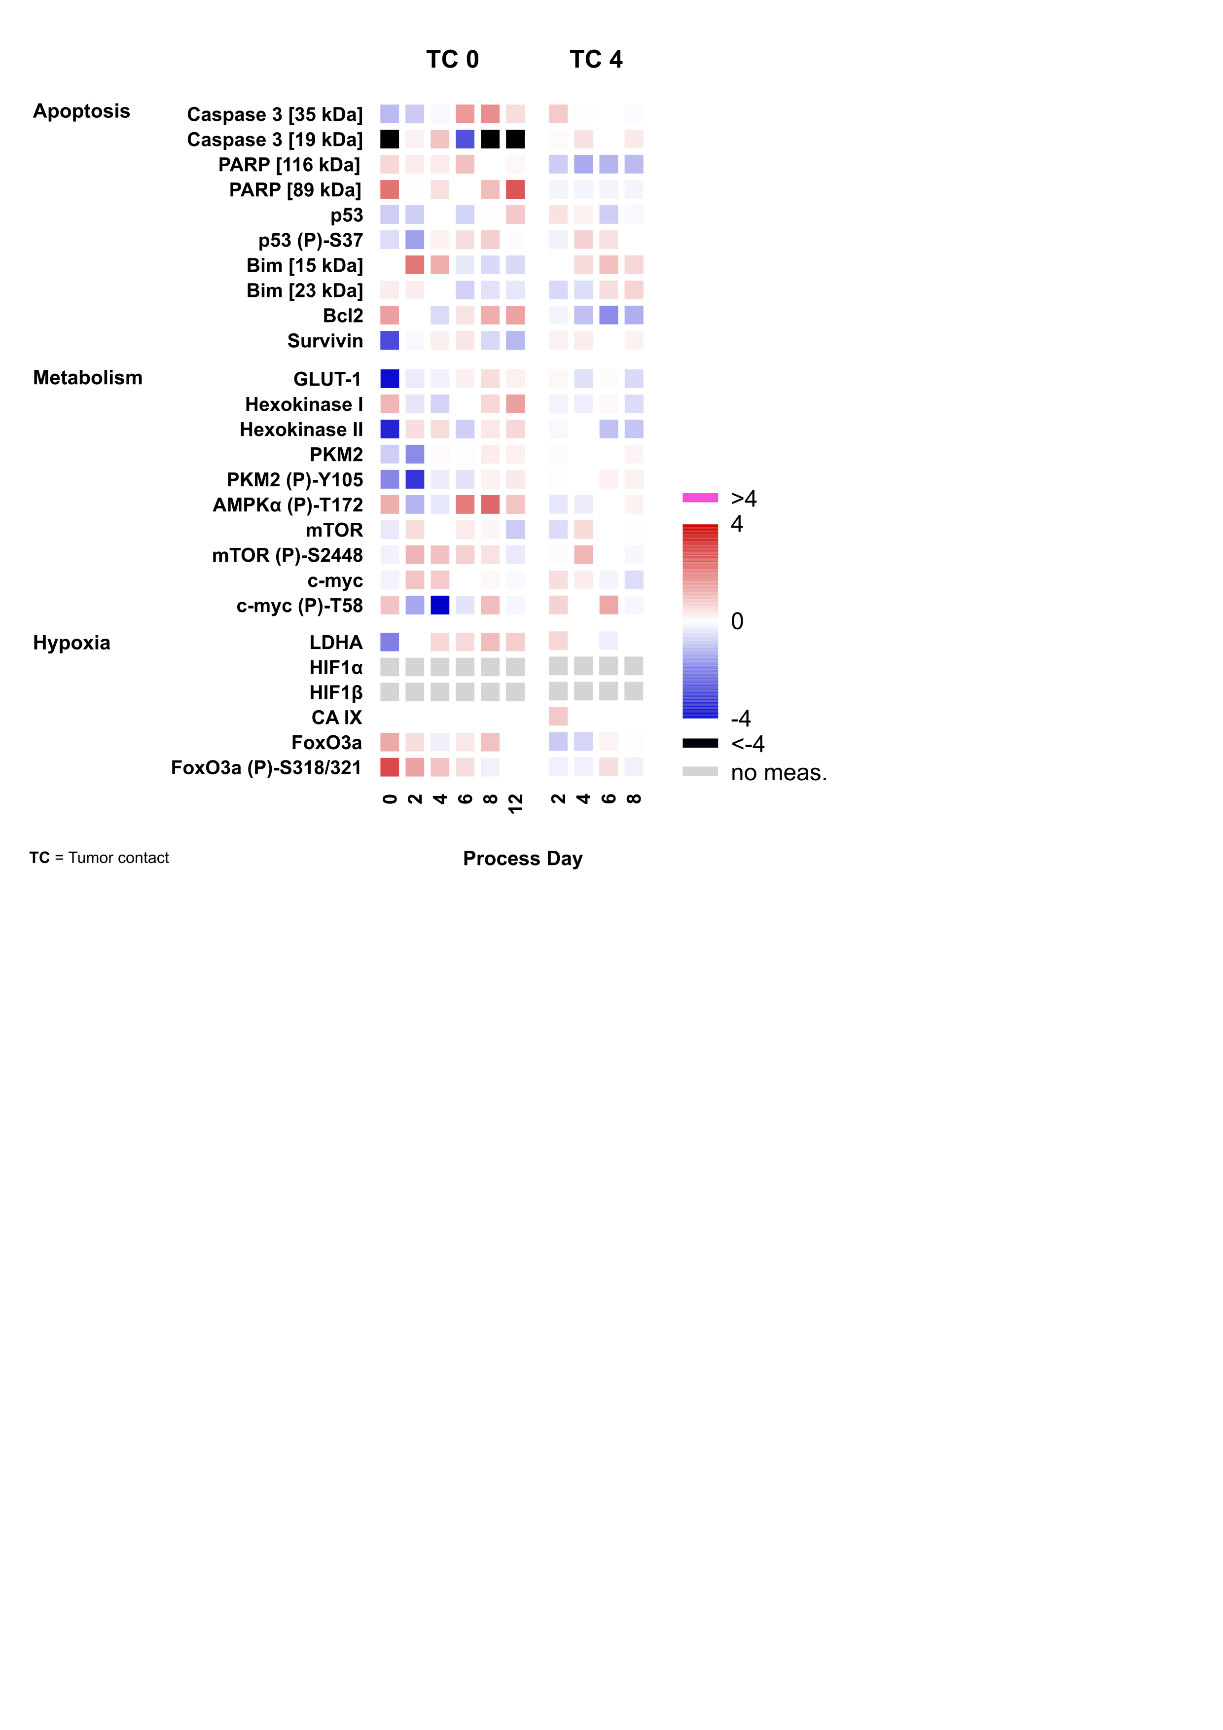


Data was log-2 normalized to the total mean of all signals. Samples are shown for Prodigy 1 (n = 1).

# **Supplementary Figure 7 CD3 internalization detected by flow cytometry.**


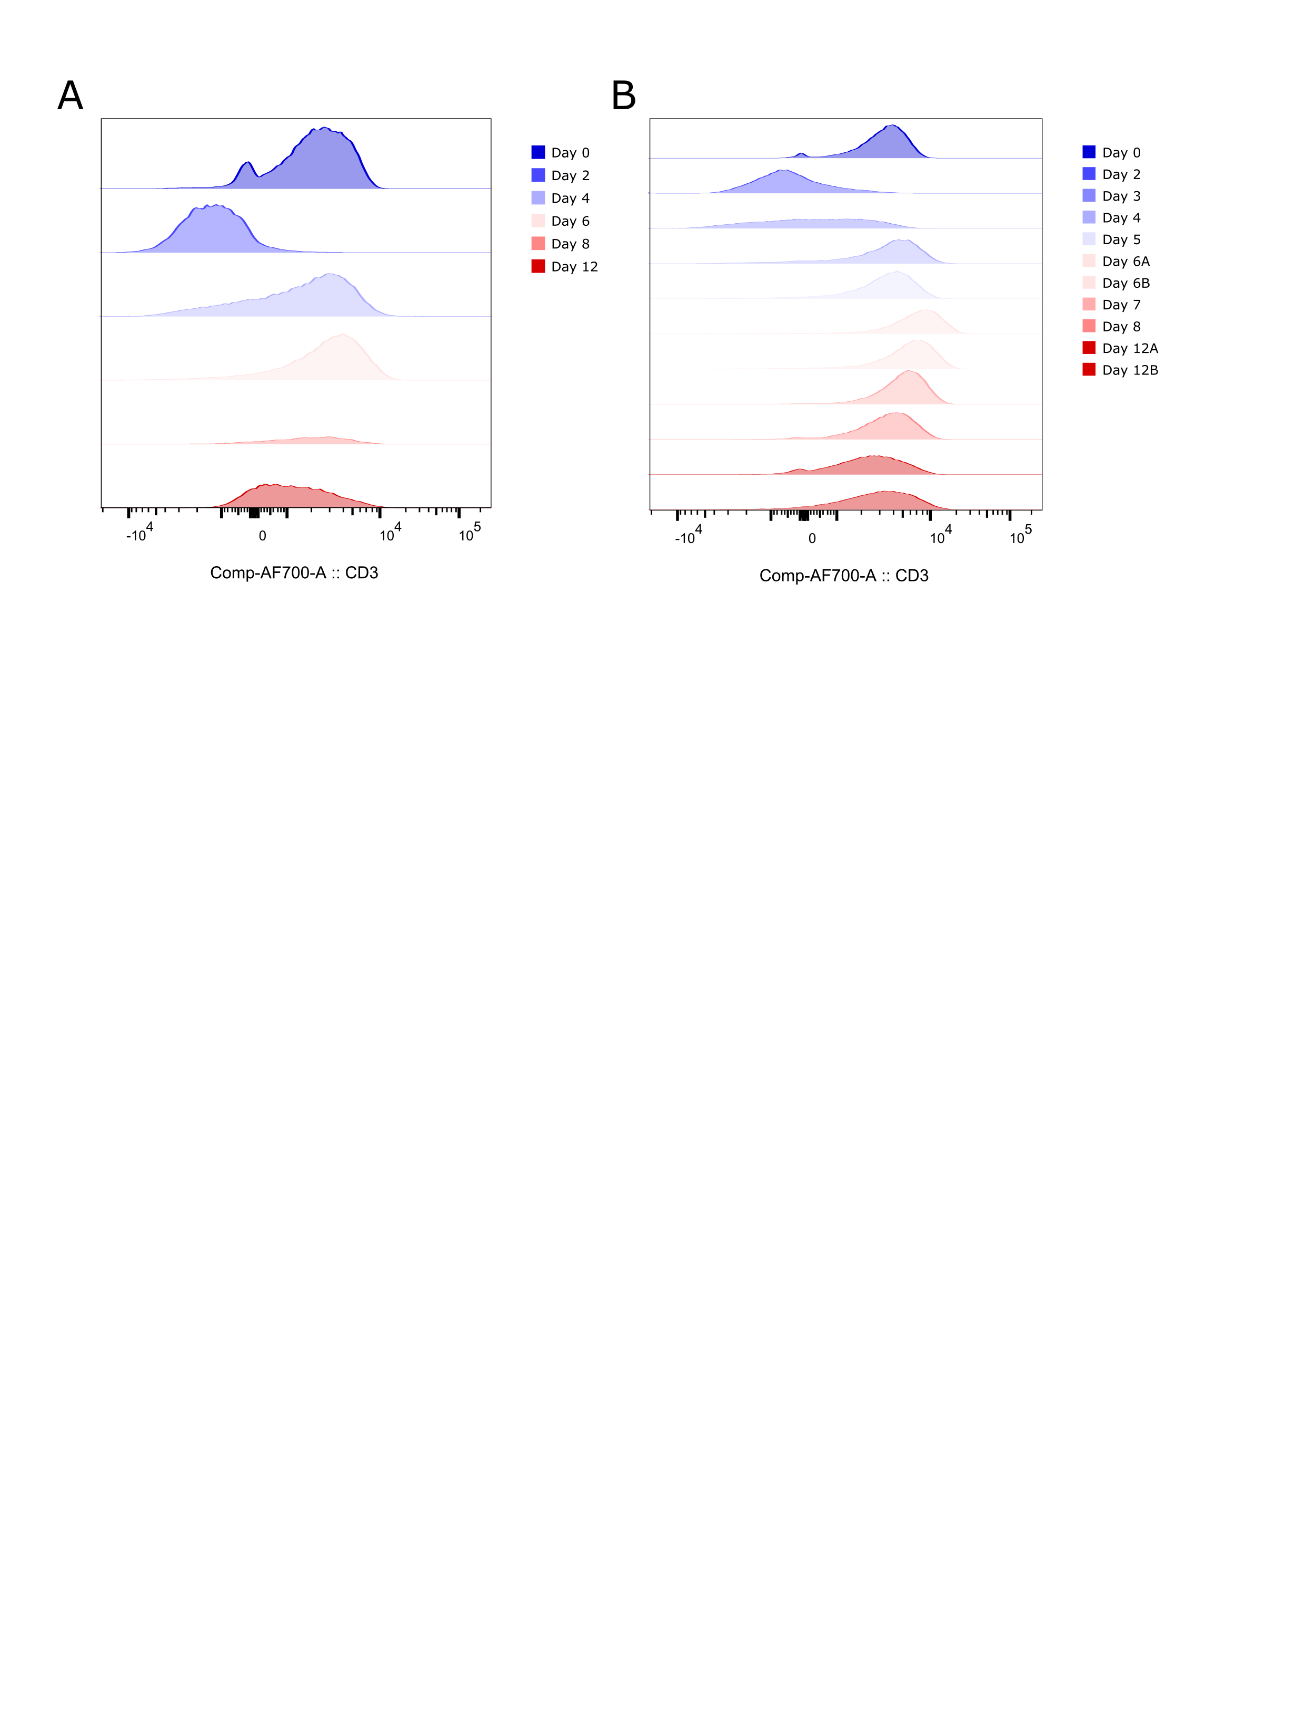


A Samples are shown for Prodigy 1 (n = 1). B Samples are shown for Prodigy 2 (n = 2).

# **Supplementary Figure 8 Phosphorylation of LAT – TCR vs CAR**

Scatter plot of DigiWest™ data for LAT and its phosphorylation sites tyrosine-171 and -191 (TC 0) and after tumor contact (TC 3). Each point represents the biological replicates for even sample days n = 2 and one technical replicate of uneven sample days n = 1. Day ö6 was sampled for all process runs.

# **Supplementary Figure 9 Fractions of T cell subsets during manufacturing and after tumor contact.**


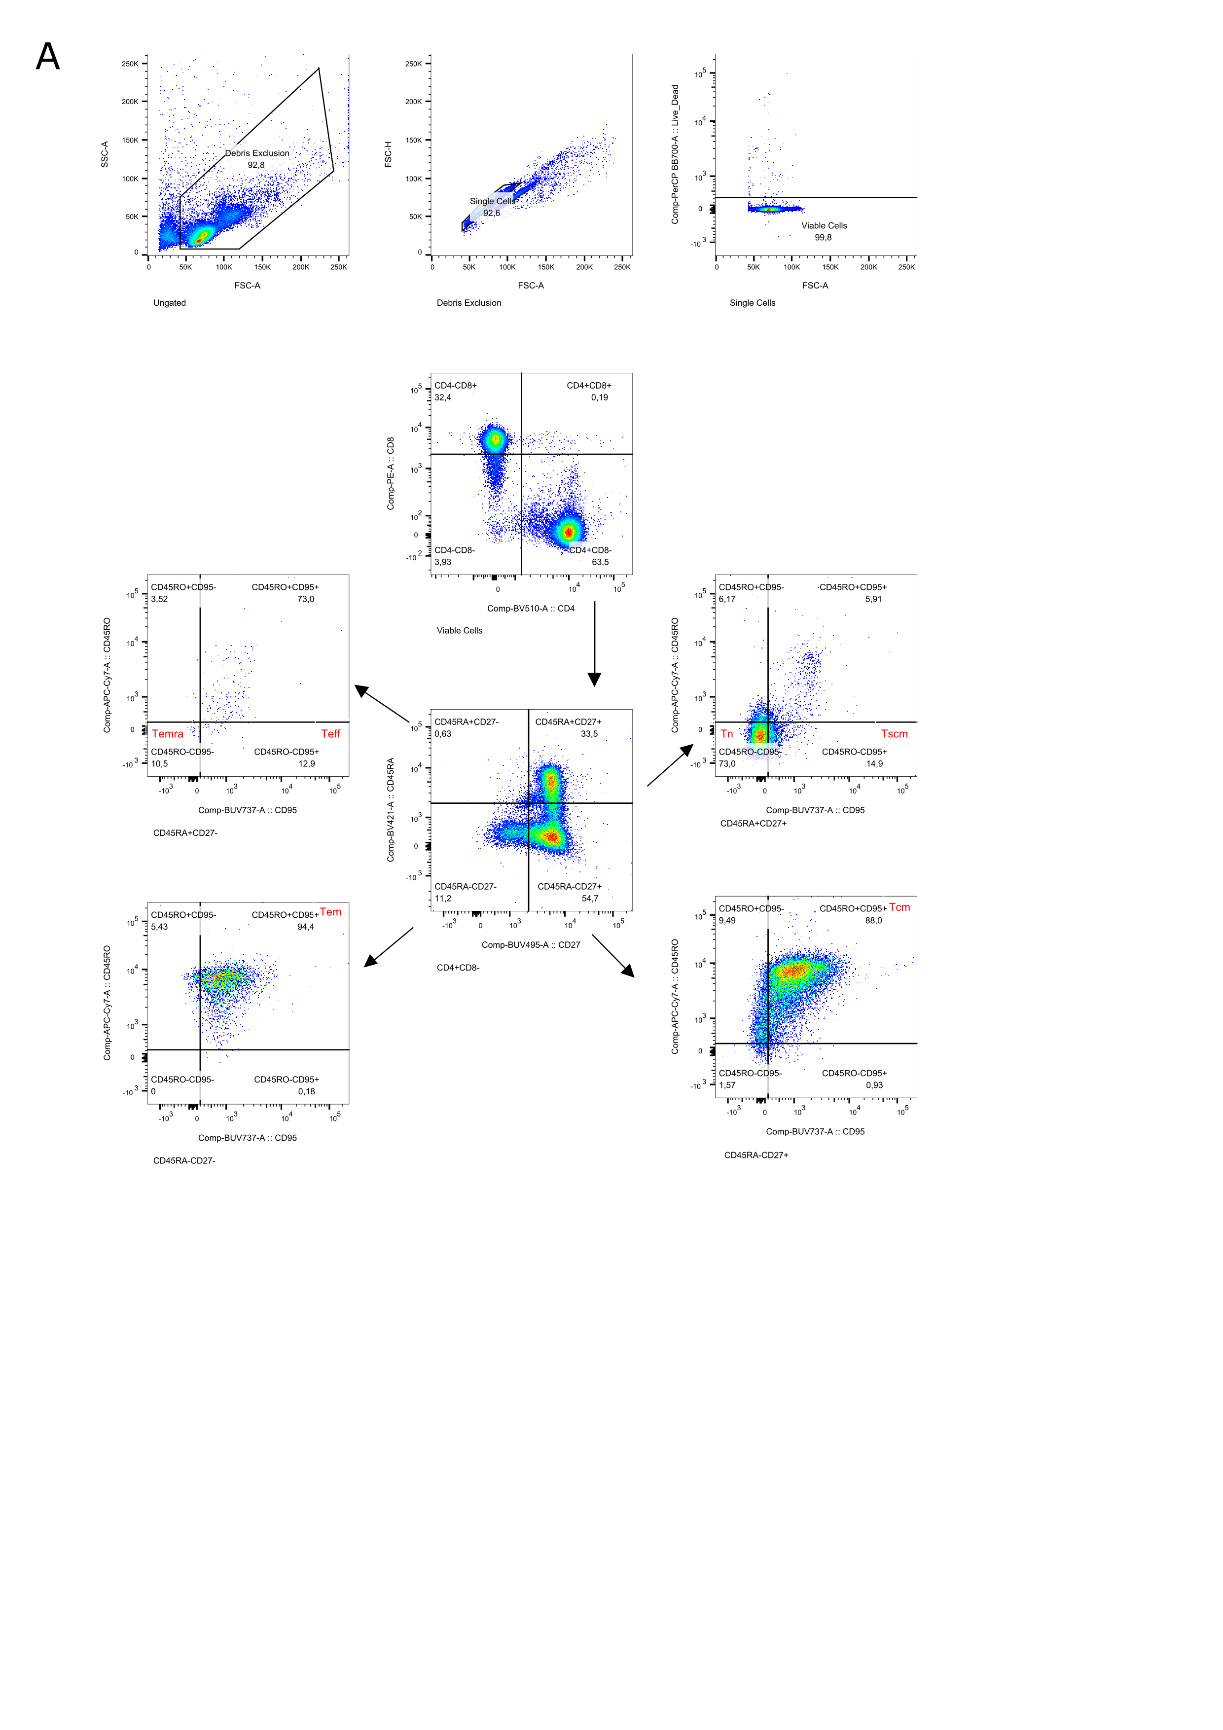


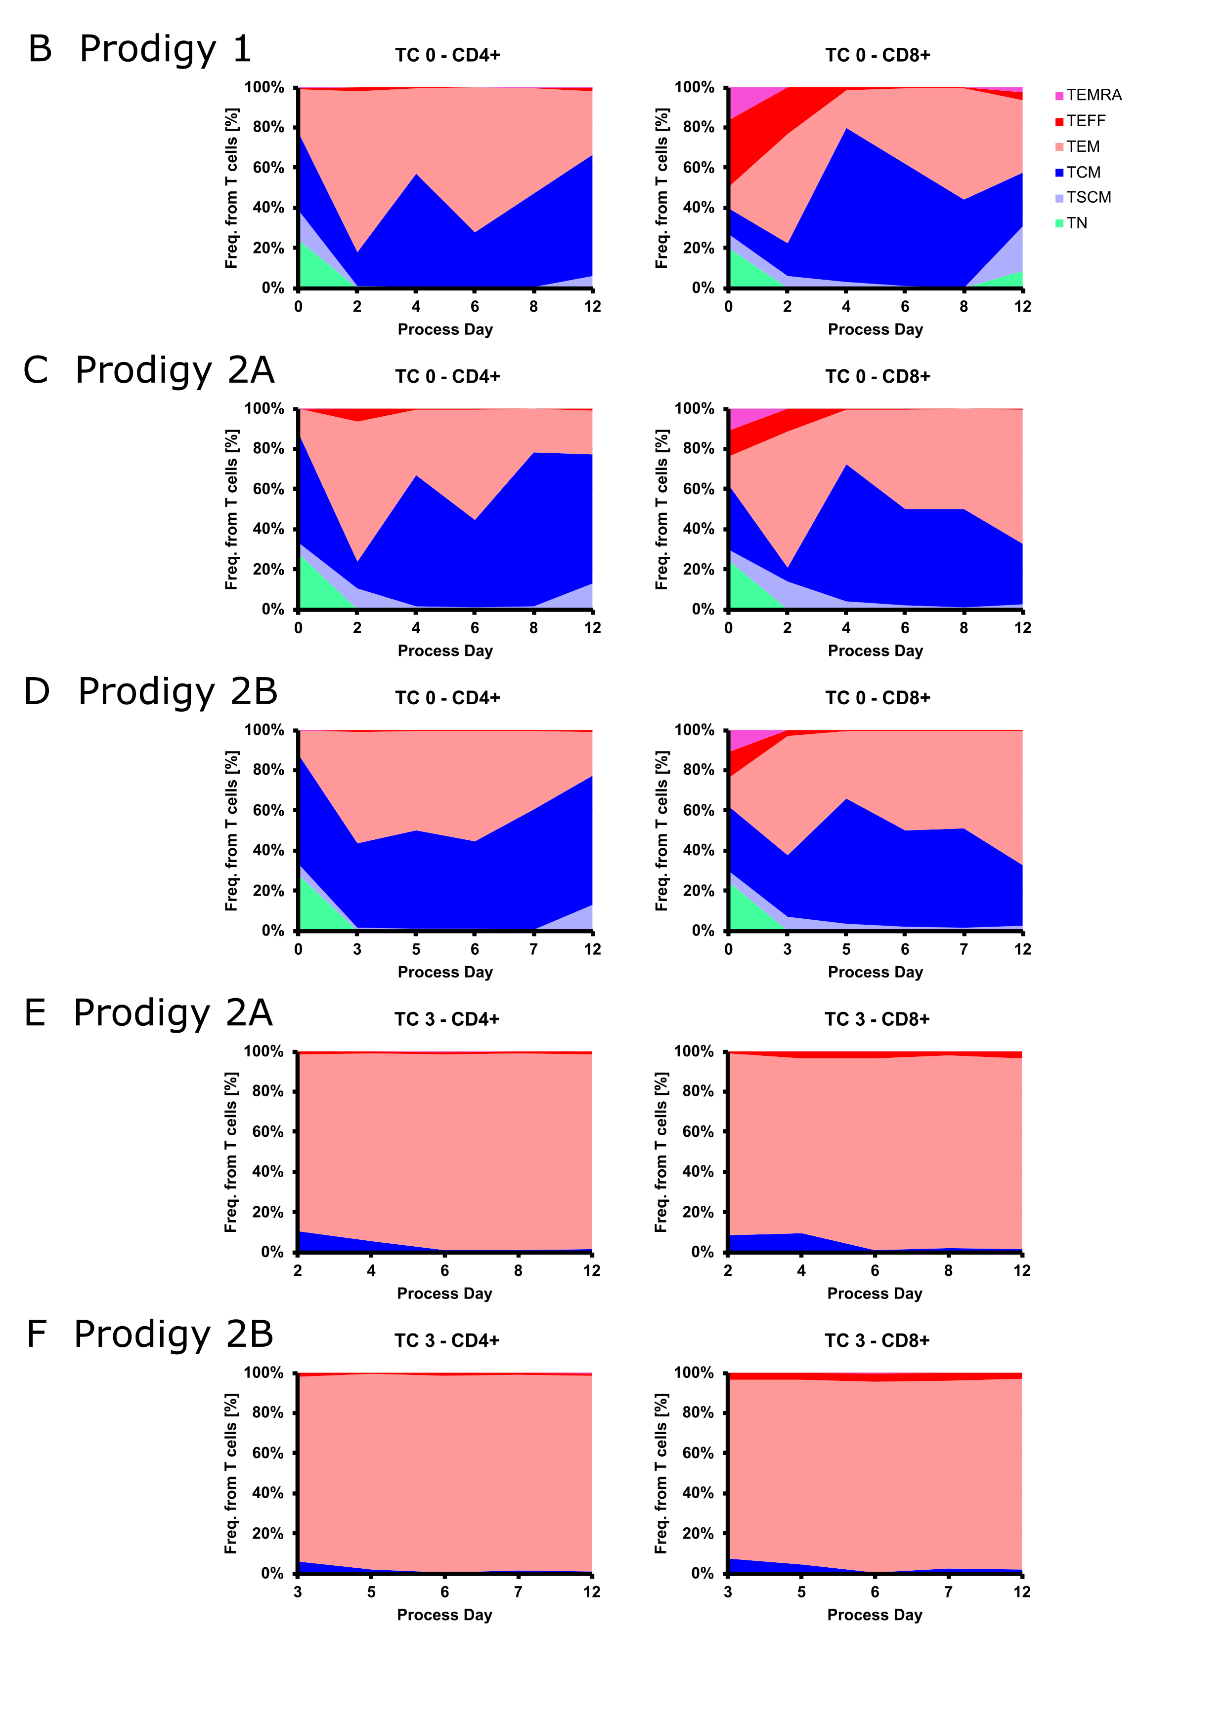


**A** Gating strategy for T cell subsets naïve CD45RA+CD45RO-CD27+CD95- (TN), memory stem cell CD45RA+CD45RO-CD27+CD95+ (TSCM), central memory CD45RA-CD45RO+CD27+CD95+ (TCM), effector memory CD45RA-CD45RO+CD27-CD95+ (TEM), effector function CD45RA+CD45RO-CD27-CD95+ (TEFF) and terminally differentiated effector memory CD45RA+CD45RO-CD27-CD95- (TEMRA). **B** Stacked area chart showing the relative proportions of cell populations of T cell subsets across samples of Prodigy 1. **C** Stacked area chart showing the relative proportions of CD4+ or CD8+ cell populations of T cell subsets across samples of Prodigy 2A. **D** Stacked area chart showing the relative proportions of CD4+ or CD8+ cell populations of T cell subsets across samples of Prodigy 2B. **E** Stacked area chart showing the relative proportions of CD4+ or CD8+ cell populations of T cell subsets across samples of Prodigy 2A after three tumor contacts (TC 3). **F** Stacked area chart showing the relative proportions of CD4+ or CD8+ cell populations of T cell subsets across samples of Prodigy 2B after three tumor contacts (TC 3).

# **Supplementary Figure 10 Hierarchical clustering of complete DigiWest panel for Prodigy 2.**


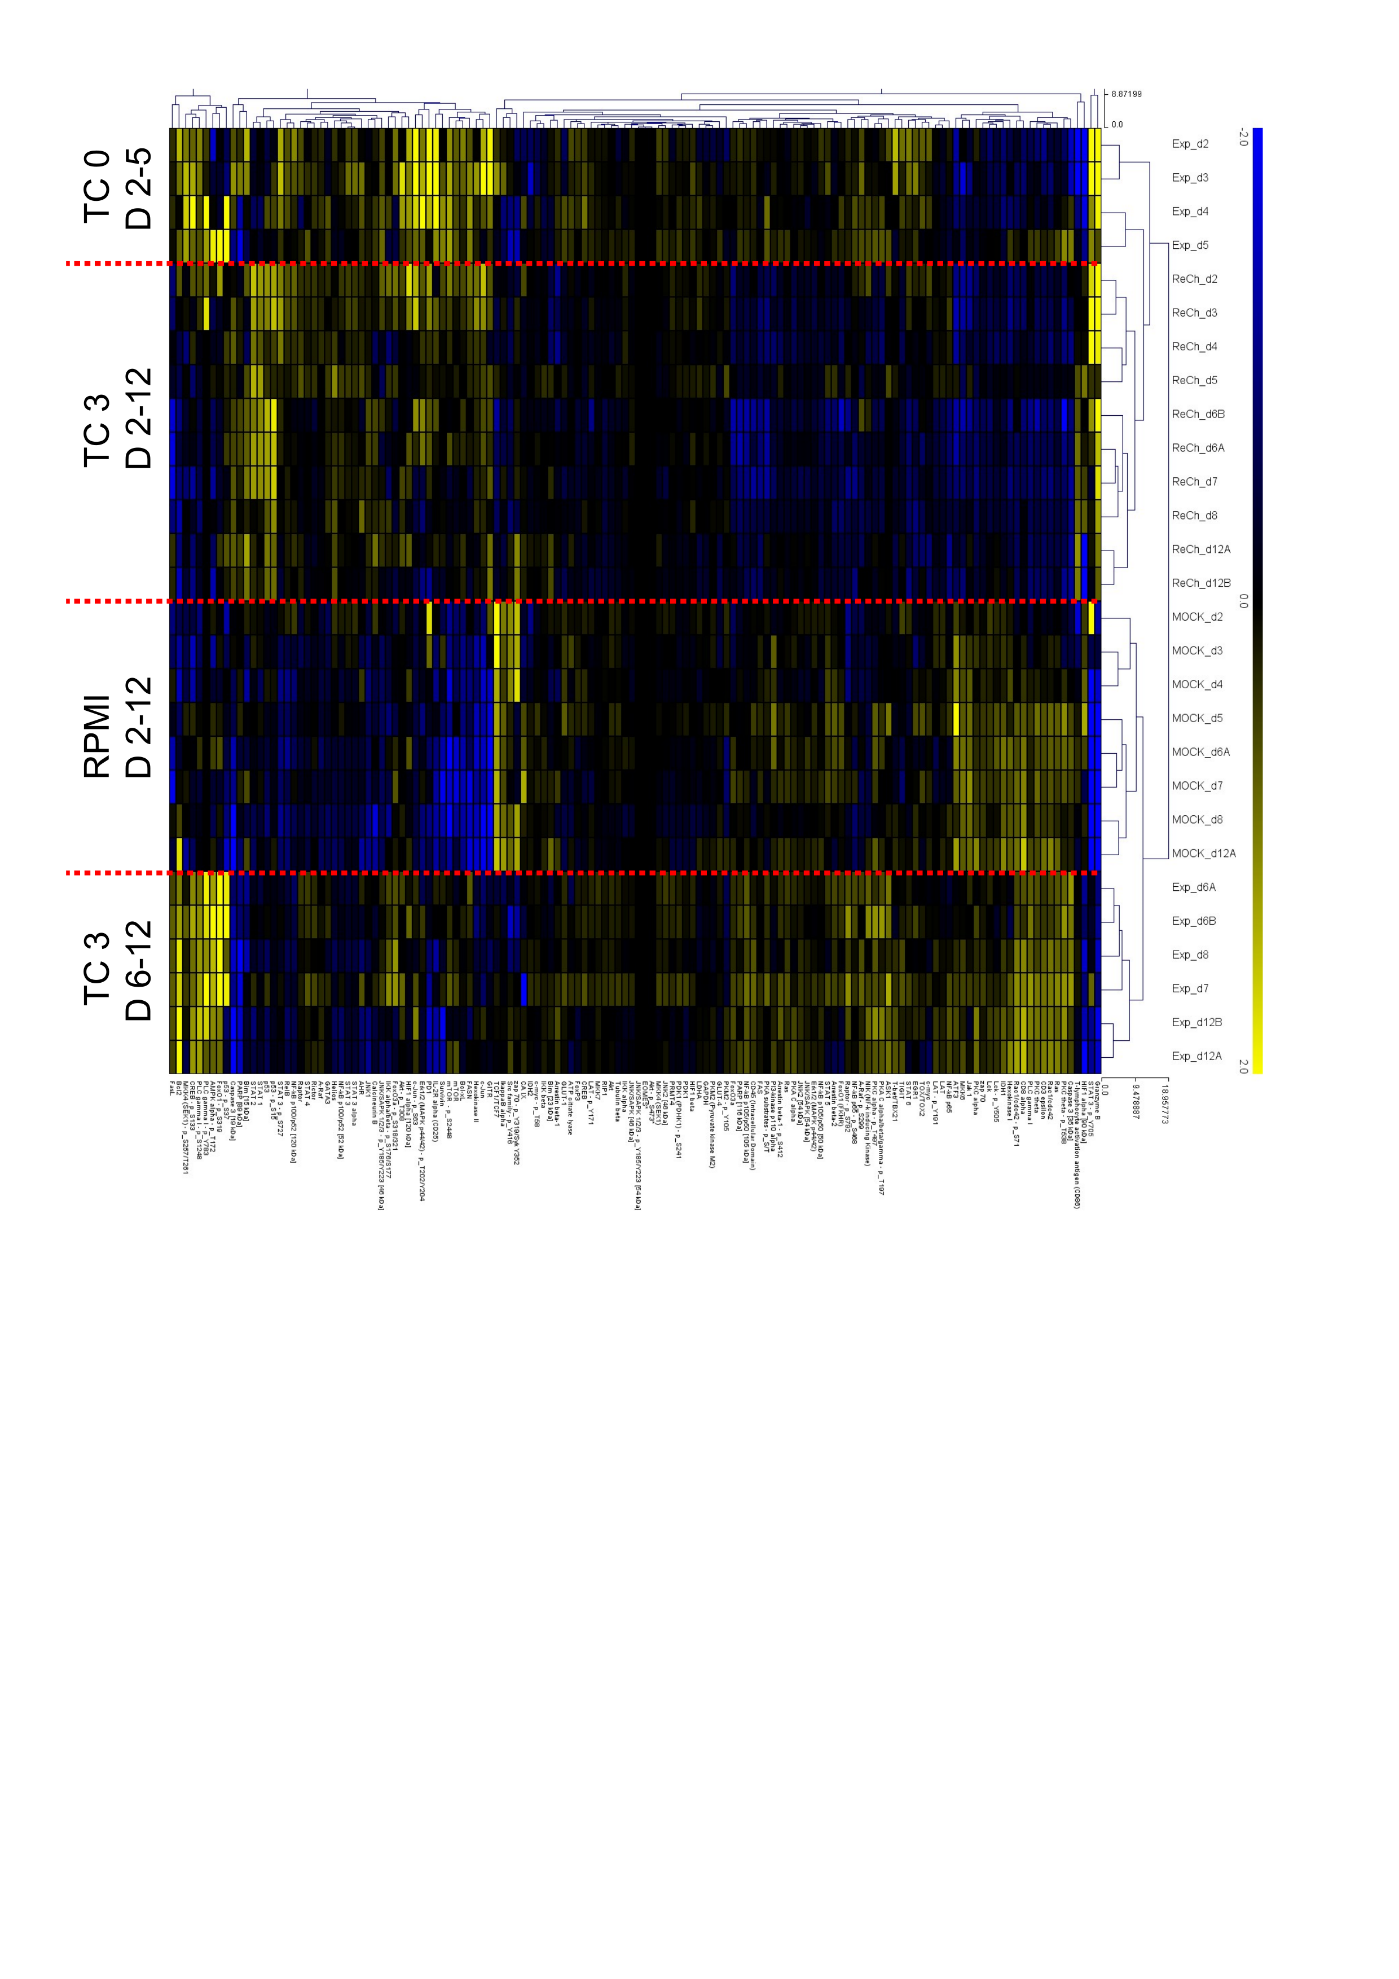


Heat map of expression signals for each analyte detected via DigiWest™ technology. Samples are shown for Prodigy 2 (n = 1) and its technical replicate (n = 1). Samples are divided into pre‑tumor contact (TC 0), after three consecutive tumor contacts (TC 3) and medium without tumor cells (RPMI) prior to TC 1. Data have been normalized to total protein signal. Data have been centered to the overall median signal, and log2 transformed. Hierarchical cluster linkage analysis (Euclidian distance, complete linkage) has been carried out (using MeV4.9).
